# Supplementary material for: Asymmetric Distribution of Primary Cilia Allocates Satellite Cells for Self-Renewal
Source: PubMed Central journal article supplement — Stem Cell Reports. 2016 May 5;6(6):798–805. doi: 10.1016/j.stemcr.2016.04.004 (PMC4912054; doi:10.1016/j.stemcr.2016.04.004), 2016-05-05
Supplement: mmc1.pdf [file mmc1.pdf]

**Stem Cell Reports, Volume 6**

**Supplemental Information**

**Asymmetric Distribution of Primary Cilia Allocates Satellite Cells for  
Self-Renewal**

**Nur Hayati Jaafar Marican, Sara B. Cruz-Migoni, and Anne-Gaëlle Borycki**

## **Supplemental Information**

### **Experimental Procedures**

#### **Drug treatment**

CDK4/6 inhibitor (PD0332991 isothionate; Sigma) was used to induce G1-cell cycle arrest. A dose-response curve was first established to determine the concentration required to block cell cycle progression. Thereafter, myofibers were treated with 750nM CDK4/6 inhibitor for 24 hours or for 24 hours followed by 48 hours in normal culture medium. Control myofibers were supplemented with 0.1% DMSO (Sigma). Taxol (2 $\mu$ M; Sigma) and Nocodazole (4 $\mu$ M; Sigma) were used at concentrations previously reported to block microtubules/cilia reassembly (Sharma et al., 2011). Forchlorfenuron (FCF; Sigma), diluted in DMSO, was tested on myofiber cultures at concentrations varying from 10  $\mu$ M to 100  $\mu$ M. A concentration of 10  $\mu$ M was used subsequently, as it had no effect on proliferation. Taxol or nocodazole or FCF or DMSO (control) were added to the culture medium at 66 hours and myofibers were cultured for another 6 hours before harvesting and fixing in 4% PFA.

#### **Immunofluorescence microscopy and imaging**

Myofibers were permeabilized in 0.5% Triton X-100 (Sigma) in PBS for 6 minutes, washed in PBS 1X, and incubated in blocking solution (20% horse serum in PBS; GIBCO) for 30 minutes at RT. Primary antibodies in PBS were applied to fibers and fibers were incubated overnight at 4°C. Following 3 washes in 0.025% Tween20 in PBS (ACROS Organics), secondary antibodies diluted at 1:500 in PBS were applied and fibers were incubated for 1 hour at RT. Fibers were then mounted in Vectashield with Dapi (Vector labs) and images captured on a Zeiss ApoTome 2. All images were assembled in Adobe Photoshop. Antibodies are listed in Table S1.

## Transmission electron microscopy

72-hour cultured myofibers were fixed in 4% PFA + 2.5% glutaraldehyde in PBS and embedded in Epon resin. Thin sections (85nm) were taken using a glass knife on an ultra-microtome (Leica UC6). Sections were collected on copper grids and electron micrographs were obtained from a transmission electron microscope FEI Tecnai G2 Blotwin at 120kv imaged by a Gatan Orius SC1000B digital camera.

## References for Experimental Procedures

Sharma, N., Kosan, Z.A., Stallworth, J.E., Berbari, N.F., and Yoder, B.K. (2011). Soluble levels of cytosolic tubulin regulate ciliary length control. *Molecular biology of the cell* 22, 806-816.

**Table S1: List of antibodies used in this study**

| Primary antibodies   | Type              | Product code | Dilution | Provider                             |
|----------------------|-------------------|--------------|----------|--------------------------------------|
| PAX7                 | Mouse monoclonal  | Pax7         | 1:20     | Developmental Studies Hybridoma Bank |
| MYOGENIN             | Mouse monoclonal  | F5D          | 1:50     | Developmental Studies Hybridoma Bank |
| MYOGENIN             | Rabbit polyclonal | sc-576       | 1:60     | Santa Cruz Biotech                   |
| MYF5                 | Rabbit polyclonal | sc-302       | 1:1000   | Santa Cruz Biotech                   |
| MYOD                 | Rabbit polyclonal | sc-304       | 1:2000   | Santa Cruz Biotech                   |
| M-CADHERIN           | Goat polyclonal   | sc-6470      | 1:250    | Santa Cruz Biotech                   |
| CAVEOLIN-1           | Rabbit polyclonal | sc-894       | 1:400    | Santa Cruz Biotech                   |
| ARL13B               | Mouse monoclonal  | 75-287       | 1:1000   | UC Davis/NIH NeuroMab Facility       |
| GFP                  | Chick polyclonal  | ab13970      | 1:600    | ABCam                                |
| Acetylated TUBULIN   | Mouse monoclonal  | T6793        | 1:300    | Sigma                                |
| Secondary antibodies | Type              | Product code | Dilution | Provider                             |
| Alexa 594 anti-goat  | Donkey            | A11058       | 1:500    | Life Technologies                    |

|                       |                   |        |       |                   |
|-----------------------|-------------------|--------|-------|-------------------|
|                       | polyclonal        |        |       |                   |
| Alexa 594 anti-mouse  | Goat polyclonal   | A11005 | 1:500 | Life Technologies |
| Alexa 488 anti-mouse  | Donkey polyclonal | A21202 | 1:500 | Life Technologies |
| Alexa 488 anti-rabbit | Goat polyclonal   | A11008 | 1:500 | Life Technologies |
| Alexa 633 anti-rabbit | Goat polyclonal   | A21071 | 1:500 | Life Technologies |

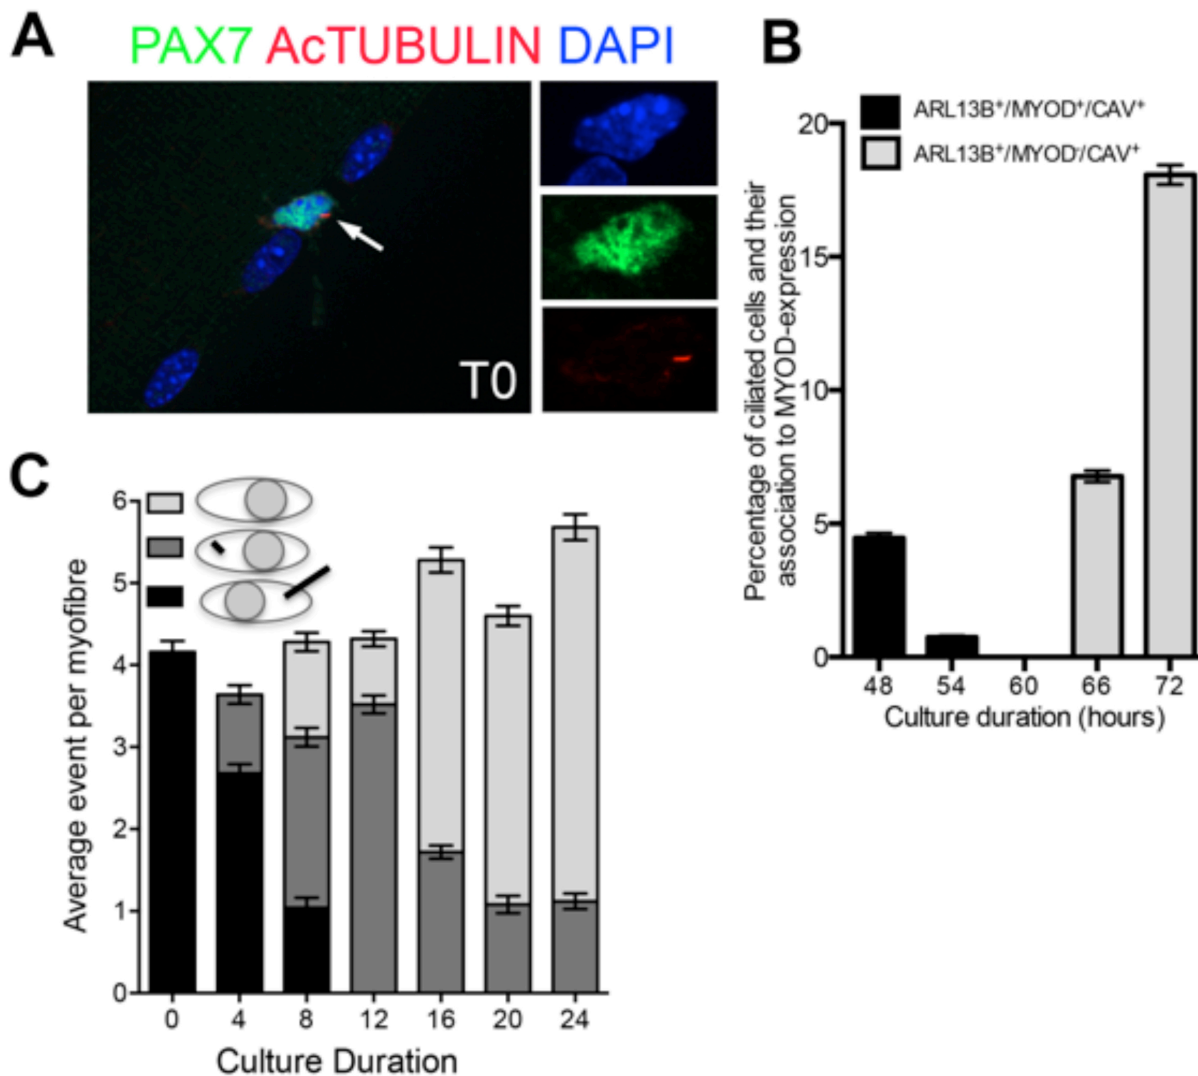

**Figure S1. Primary cilia are disassembled as satellite cells enter proliferation and**

**differentiation.** (A) Immuno-fluorescence characterization of primary cilia at the surface of quiescent SCs. Freshly isolated *Tg(Pax7-GFP)* myofibers were analysed by immunofluorescence using antibodies against GFP (green) and acetylated a TUBULIN (red). The white arrow indicates a primary cilium at the surface of a SC. (B) Time-course analysis of cilia resorption in the first 24 hours of myofiber culture. Cilia were recorded at 4-hour intervals according to their length as illustrated in the images and diagrams shown above the graph. n= 50 fibres from 3 independent experiments; mean  $\pm$  sem is shown. (C) Time-course analysis of cilia resorption in transit amplifying cells expressing MYOD between 48 and 72 hours. Myofibers were harvested at 6-hour intervals. n= 50 fibres per time point from 3 independent experiments; mean  $\pm$  sem is shown.

Related to Figure 1.
